# Supplementary material for: The Four-Dimensional Symptom Questionnaire (4DSQ) in the general population: scale structure, reliability, measurement invariance and normative data: a cross-sectional survey
Source: Health Qual Life Outcomes. 2016 Sep 15;14:130. doi: 10.1186/s12955-016-0533-4 (PMC5024427; doi:10.1186/s12955-016-0533-4)
Supplement: Additional file 1: — Demographic characteristics by response month. (PDF 126 kb) [file 12955_2016_533_MOESM1_ESM.pdf]

### Additional file 1: Demographic characteristics by response month<sup>a</sup>

| Characteristic                 | July<br>(n = 599) | October<br>(n = 4674) | p-values <sup>b</sup> | Total<br>(n = 5273) |
|--------------------------------|-------------------|-----------------------|-----------------------|---------------------|
| Age (mean, sd)                 | 50.3 (17.5)       | 48.6 (18.0)           | 0.031                 | 48.8 (17.9)         |
| Gender (%)                     |                   |                       | 0.211                 |                     |
| - female                       | 56.3              | 53.6                  |                       | 53.9                |
| - male                         | 43.7              | 46.4                  |                       | 46.1                |
| Ethnicity (%)                  |                   |                       | 0.309                 |                     |
| - native Dutch                 | 85.3              | 83.1                  |                       | 83.3                |
| - foreign, Western country     | 7.2               | 7.0                   |                       | 7.0                 |
| - foreign, Non-Western country | 3.8               | 4.9                   |                       | 4.8                 |
| - unknown                      | 3.7               | 5.0                   |                       | 4.9                 |
| Education (%)                  |                   |                       | 0.537                 |                     |
| - primary                      | 10.0              | 9.5                   |                       | 9.5                 |
| - lower vocational             | 21.5              | 24.3                  |                       | 24.0                |
| - secondary                    | 13.7              | 11.6                  |                       | 11.8                |
| - middle vocational            | 23.8              | 23.0                  |                       | 23.1                |
| - higher vocational            | 22.8              | 22.4                  |                       | 22.4                |
| - university                   | 8.0               | 9.0                   |                       | 8.9                 |
| - unknown                      | 0.2               | 0.3                   |                       | 0.3                 |
| Marital status (%)             |                   |                       | 0.107                 |                     |
| - married                      | 58.4              | 54.3                  |                       | 54.8                |
| - divorced                     | 9.7               | 9.1                   |                       | 9.1                 |
| - widowed                      | 5.2               | 5.0                   |                       | 5.0                 |
| - never married                | 26.7              | 31.7                  |                       | 31.1                |
| Employment status (%)          |                   |                       | 0.180                 |                     |
| - paid work                    | 50.8              | 50.7                  |                       | 50.7                |
| - unemployed                   | 3.7               | 3.4                   |                       | 3.4                 |
| - disabled                     | 3.5               | 3.9                   |                       | 3.8                 |
| - school or study              | 8.7               | 11.1                  |                       | 10.8                |
| - retired                      | 18.7              | 19.6                  |                       | 19.5                |
| - household                    | 10.4              | 7.8                   |                       | 8.1                 |
| - other                        | 4.3               | 3.5                   |                       | 3.6                 |
| Monthly net income (%)         |                   |                       | 0.577                 |                     |
| - 0–500 Euro                   | 19.2              | 18.1                  |                       | 18.2                |
| - 501–1500 Euro                | 35.9              | 35.0                  |                       | 35.1                |
| - 1501–2500 Euro               | 30.9              | 31.2                  |                       | 31.2                |
| - > 2500 Euro                  | 9.8               | 9.9                   |                       | 9.9                 |
| - unknown                      | 4.2               | 5.8                   |                       | 5.6                 |

<sup>a</sup> weighted analyses

<sup>b</sup> t-test in case of continuous variables; Chi-square test in case of categorical variables
