# Supplementary material for: The Four-Dimensional Symptom Questionnaire (4DSQ) in the general population: scale structure, reliability, measurement invariance and normative data: a cross-sectional survey
Source: Springer Nature journal article supplement (doi:10.1186/s12955-016-0533-4), 2016-09-14
Supplement: MOESM2 [file 10704814]

## Additional file 2: Demographic characteristics by data set<sup>a</sup>

| Characteristic                 | Training set<br>(n = 2635) | Validation set<br>(n = 2638) | p-values <sup>b</sup> | Total<br>(n = 5273) |
|--------------------------------|----------------------------|------------------------------|-----------------------|---------------------|
| Age (mean, sd)                 | 48.8 (17.8)                | 48.9 (18.0)                  | 0.842                 | 48.8 (17.9)         |
| Gender (%)                     |                            |                              | 0.559                 |                     |
| - female                       | 54.3                       | 53.5                         |                       | 53.9                |
| - male                         | 45.7                       | 46.5                         |                       | 46.1                |
| Ethnicity (%)                  |                            |                              | 0.983                 |                     |
| - native Dutch                 | 83.5                       | 83.2                         |                       | 83.3                |
| - foreign, Western country     | 6.9                        | 7.1                          |                       | 7.0                 |
| - foreign, Non-Western country | 4.9                        | 4.7                          |                       | 4.8                 |
| - unknown                      | 4.8                        | 4.9                          |                       | 4.9                 |
| Education (%)                  |                            |                              | 0.338                 |                     |
| - primary                      | 8.9                        | 10.2                         |                       | 9.5                 |
| - lower vocational             | 23.8                       | 24.2                         |                       | 24.0                |
| - secondary                    | 12.0                       | 11.6                         |                       | 11.8                |
| - middle vocational            | 24.2                       | 21.9                         |                       | 23.1                |
| - higher vocational            | 22.3                       | 22.5                         |                       | 22.4                |
| - university                   | 8.4                        | 9.4                          |                       | 8.9                 |
| - unknown                      | 0.3                        | 0.3                          |                       | 0.3                 |
| Marital status (%)             |                            |                              | 0.156                 |                     |
| - married                      | 54.8                       | 54.8                         |                       | 54.8                |
| - divorced                     | 10.0                       | 8.3                          |                       | 9.1                 |
| - widowed                      | 4.8                        | 5.2                          |                       | 5.0                 |
| - never married                | 30.4                       | 31.7                         |                       | 31.1                |
| Employment status (%)          |                            |                              | 0.264                 |                     |
| - paid work                    | 51.7                       | 49.8                         |                       | 50.7                |
| - unemployed                   | 3.7                        | 3.1                          |                       | 3.4                 |
| - disabled                     | 3.7                        | 4.0                          |                       | 3.8                 |
| - school or study              | 11.0                       | 10.7                         |                       | 10.8                |
| - retired                      | 19.2                       | 19.9                         |                       | 19.5                |
| - household                    | 7.2                        | 8.9                          |                       | 8.1                 |
| - other                        | 3.6                        | 3.6                          |                       | 3.6                 |
| Monthly net income (%)         |                            |                              | 0.199                 |                     |
| - 0–500 Euro                   | 18.1                       | 18.3                         |                       | 18.2                |
| - 501–1500 Euro                | 35.9                       | 34.4                         |                       | 35.1                |
| - 1501–2500 Euro               | 31.3                       | 31.0                         |                       | 31.2                |
| - > 2500 Euro                  | 9.0                        | 10.9                         |                       | 10.0                |
| - unknown                      | 5.7                        | 5.4                          |                       | 5.6                 |

<sup>a</sup> weighted analyses

<sup>b</sup> t-test in case of continuous variables; Chi-square test in case of categorical variables
